# Supplementary material for: Ormosil nanoparticles as a sustained-release drug delivery vehicle
Source: Royal Society of Chemistry journal article supplement (doi:10.1039/c4ra10293b), 2014-01-01
Supplement: c4ra10293b1.pdf [file c4ra10293b1.pdf]

## Electronic Supplementary Information (ESI)

RSC Advances

### Ormosil nanoparticles as a sustained-release drug delivery vehicle.

Indrajit Roy <sup>a\*</sup>, Pramod Kumar <sup>a</sup>, Rajiv Kumar <sup>b</sup>, Tymish Y. Ohulchanskyy <sup>b</sup>, Ken-Tye Yong <sup>c</sup>,  
and Paras N Prasad <sup>b\*</sup>

<sup>a</sup> Department of Chemistry, University of Delhi, Delhi-110007, India. Email: [indrajitroy11@gmail.com](mailto:indrajitroy11@gmail.com); Tel: +91-9560721851.

<sup>b</sup> Department of Chemistry and the Institute for Lasers, photonics and Biophotonics, State University of New York at Buffalo, Buffalo, NY-14226. Email: [pnprasad@buffalo.edu](mailto:pnprasad@buffalo.edu); Tel: (716) 645-4147.

<sup>c</sup> School of Electrical and Electronic Engineering, Nanyang Technological University, 639798, Singapore.

Enclosure: Two figures

|              | Zeta Potential |           |
|--------------|----------------|-----------|
|              | Without Dox    | With Dox  |
| <b>ORM-S</b> | -18.5 mV       | - 9.7 mV  |
| <b>ORM-M</b> | -16.3 mV       | - 10.3 mV |
| <b>ORM-L</b> | -16.8 mV       | - 8.9 mV  |

Fig. S1: Table showing surface charge (zeta potential) of ORM-S, ORM-M and ORM-L nanoparticles, without and with Dox encapsulation.

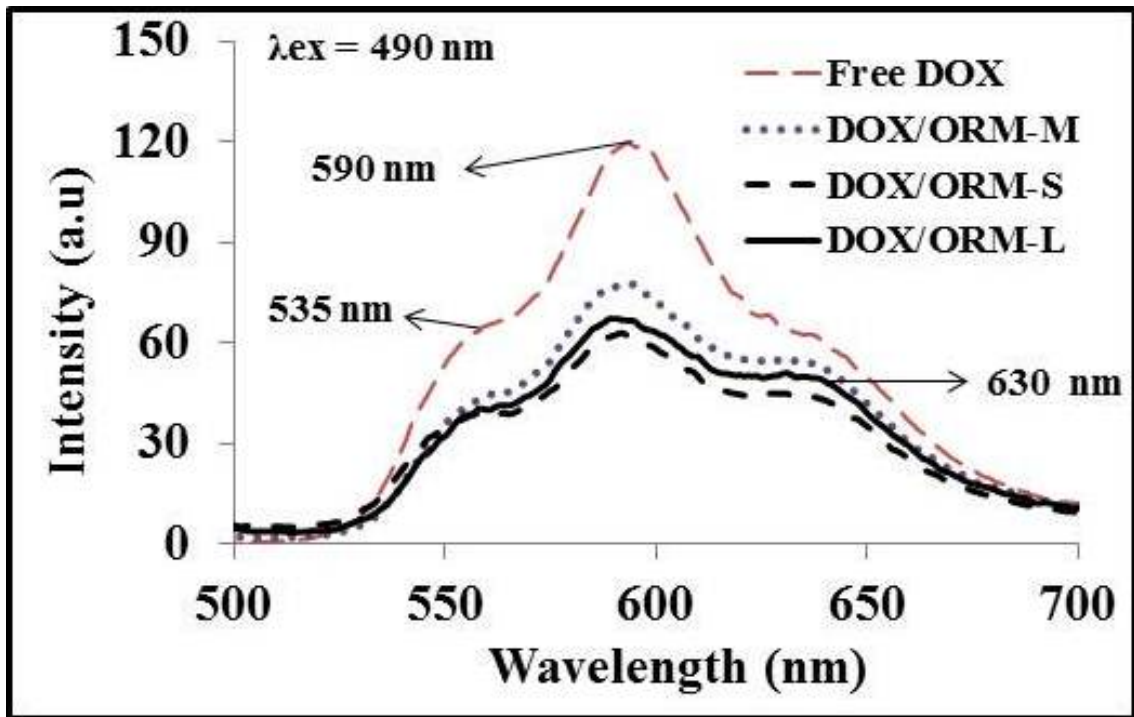

Fig. S2: Fluorescence spectra of free Dox, and Dox encapsulated in small (Dox/ORM-S), medium (Dox/ORM-M) and large (Dox/ORM-L) ormosil nanoparticles.
